# Supplementary material
Source: Springer Nature journal article supplement (https://www.springermedizin.de/resource/supplementary/12879_2008_858_MOESM4_ESM.pdf/9449938)

1

2

3

4

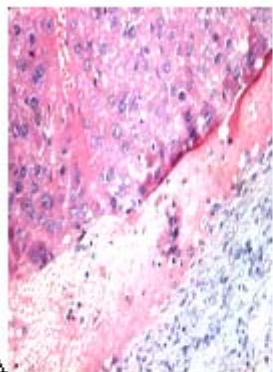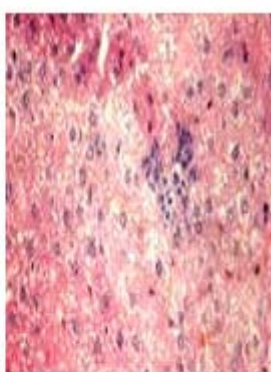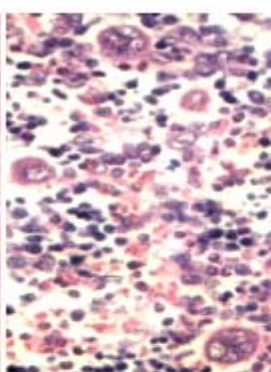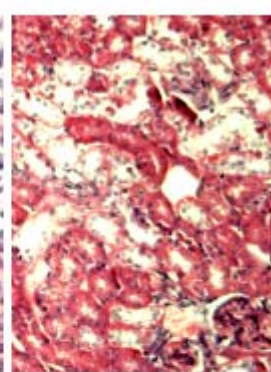

5

6

7

8

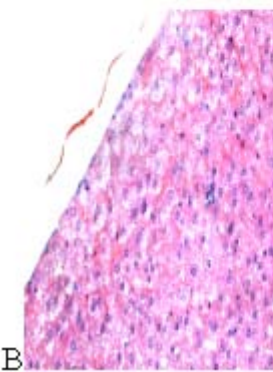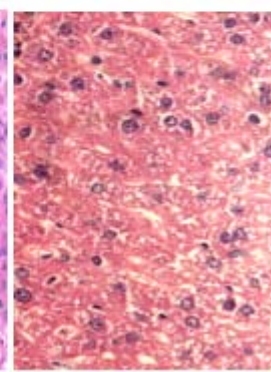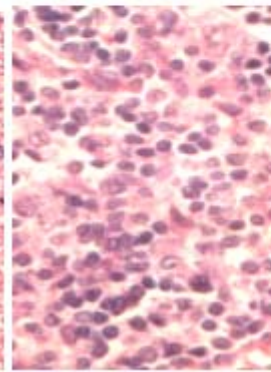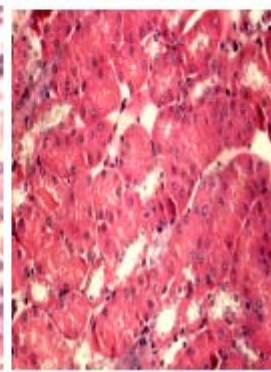

A

B

Supplement: MOESM4 [file 9449938]
